# Supplementary material for: High throughput microscopy identifies bisphenol AP, a bisphenol A analog, as a novel AR down-regulator
Source: Oncotarget. 2016 Feb 24;7(13):16962–74. doi: 10.18632/oncotarget.7655 (PMC4941363; doi:10.18632/oncotarget.7655)
Supplement: Supplementary file 1 [file oncotarget-07-16962-s001.pdf]

## SUPPLEMENTARY FIGURES AND TABLE

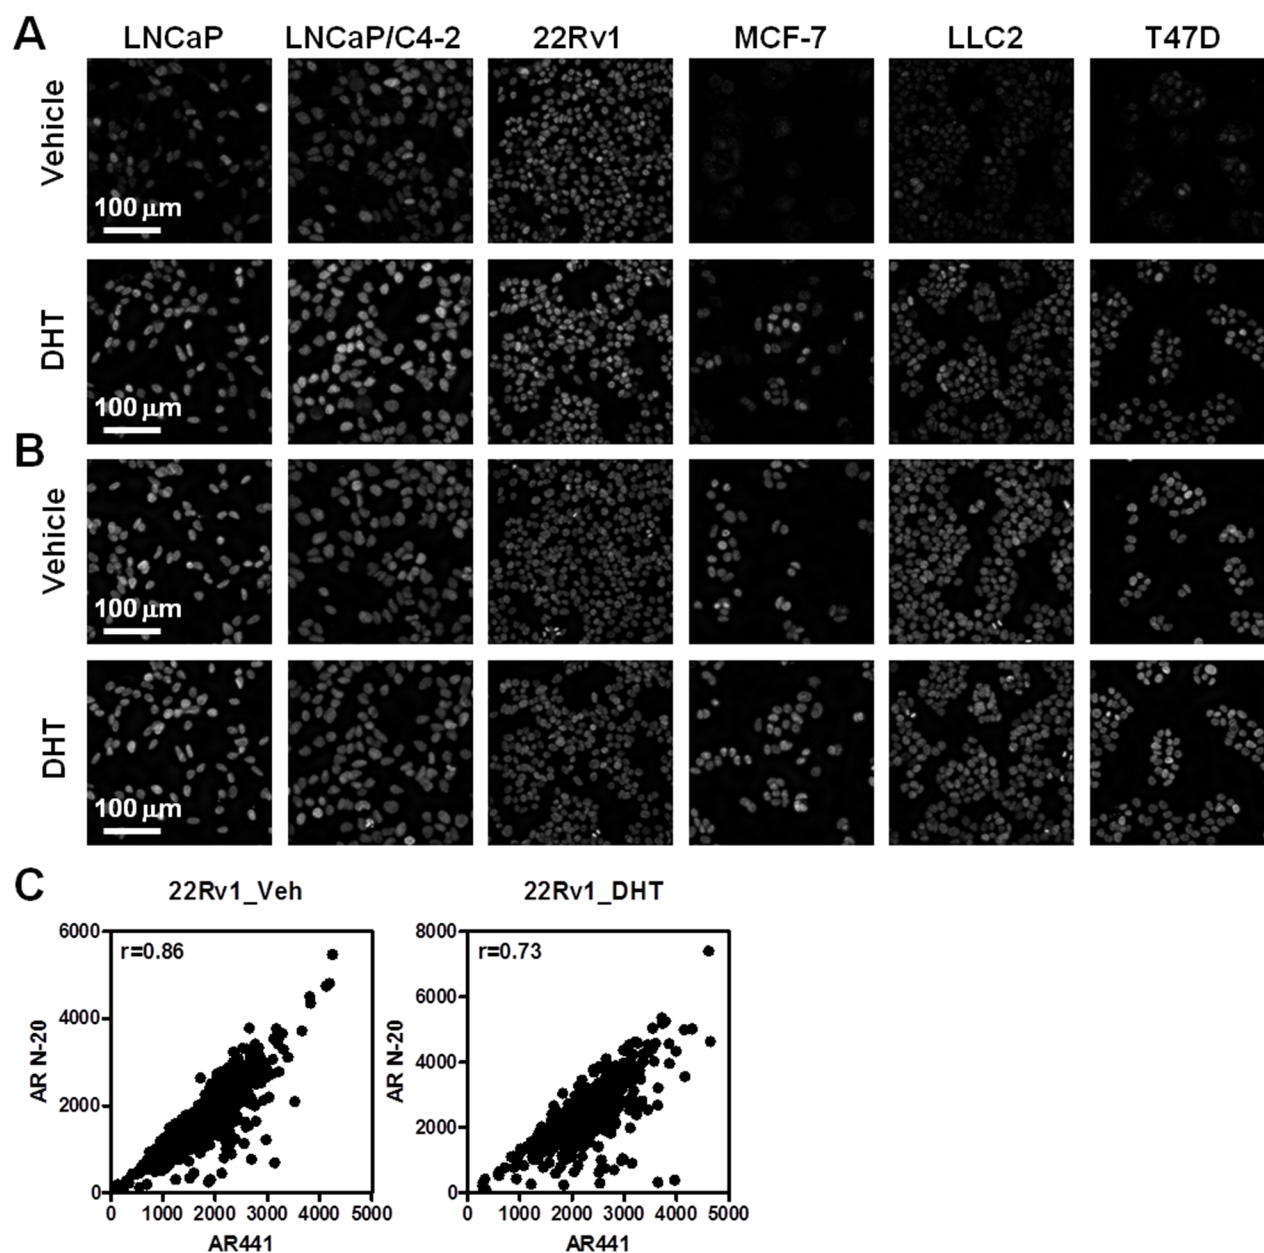

**Supplementary Figure S1: High throughput microscopy-based analysis of endogenous AR nuclear level and translocation across prostate and breast cancer cell lines. A–B.** Representative images of the cell lines used in HTM labeled with AR N-20 antibody or stained with DAPI after 24 hrs of treatment with either vehicle or 1 nM DHT. **C.** Spearman correlation analysis between AR441 and AR N-20 after dual immunofluorescence in 22Rv1.

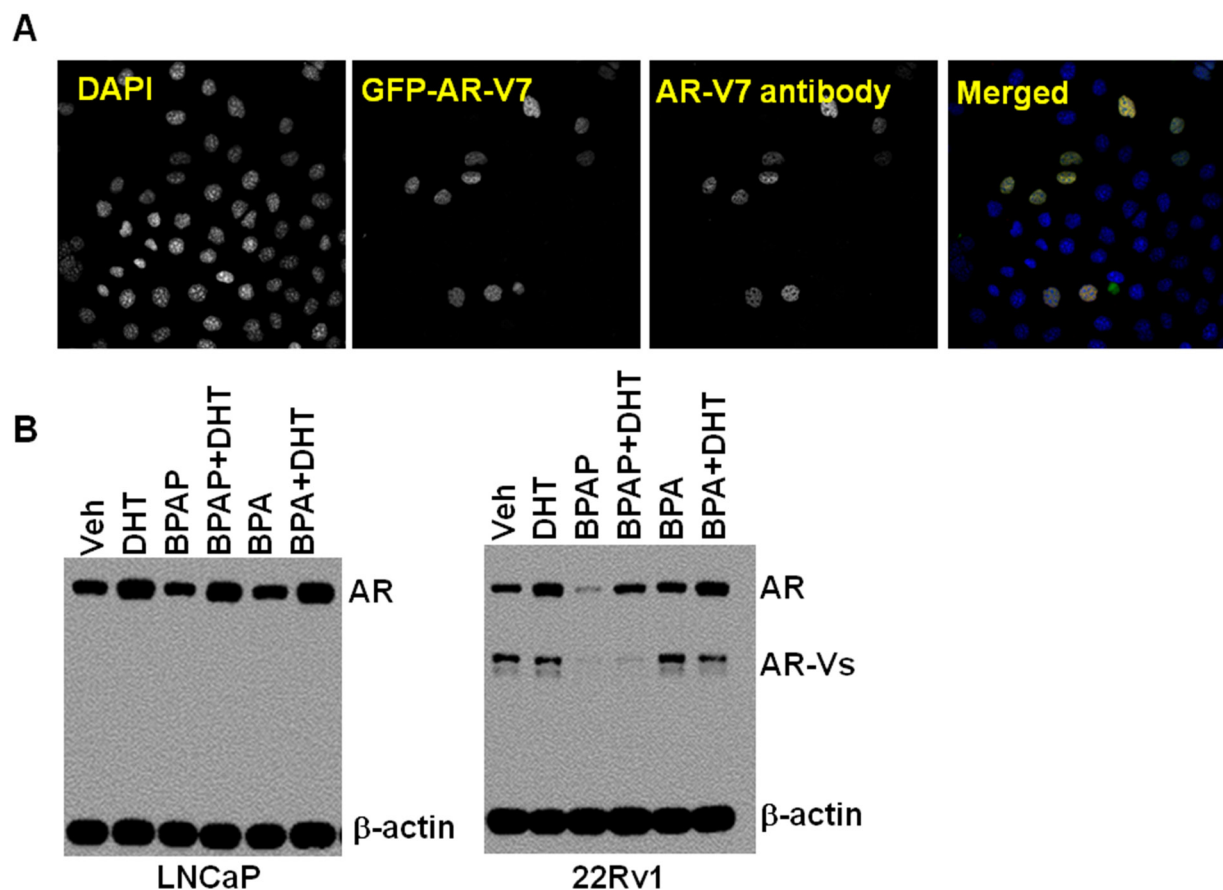

**Supplementary Figure S2: Validation of AR-V7 antibody by imaging and effect of BPA on AR-V7.** A. GFP-AR-V7:PC-3 were treated with vehicle or 20  $\mu$ M BPAP for 24 hrs and immunolabeled with AR-V7 antibody. B. Western blot in LNCaP and 22Rv1 showing reduction of AR (full length and variants) only in 22Rv1. Cells were treated with 20  $\mu$ M BPA or BPAP for 24 hrs +/- DHT.

**Supplementary Table S1: qPCR primer sequences**

| Gene   | Forward                                | Reverse                             |
|--------|----------------------------------------|-------------------------------------|
| AR     | cggaagctgaagaaacttg                    | atggcttcaggacattcag                 |
| AR-V7  | caccatggaagtgcagttagggtcggaagggtctacct | tcagggtctggtcattttgagatgcttgaattgcc |
| EDN2   | tgggtgaacactcctgaaca                   | aggcagaagggtggcacag                 |
| IDH3A  | agccggtcacccatctatgaa                  | cttctgtgtctctcgaatggc               |
| NKX3.1 | gagacgtggcagagacc                      | tccaacagataagacccaag                |
| NTS    | gcacgtactcctggcttc                     | ccaagagggaacatgtgctt                |
| PSA    | tccctatgggatcagactgc                   | tgggtaggtggagaatggag                |
| TPRSS2 | ggtagtactgagccggatgc                   | caccaccagctattggacct                |
